# Supplementary material for: Transition to siblinghood causes a substantial and long-lasting increase in urinary cortisol levels in wild bonobos
Source: eLife journal article supplement (doi:10.7554/elife.77227), 2022-08-30
Supplement: supp [file elife-77227-supp-v1.zip]

Archive with 10 entries (10 files):
- elife_poa_e77227_Figure_1_figure_supplement_1.tif
- elife_poa_e77227_Figure_1_figure_supplement_2.tif
- elife_poa_e77227_Figure_1_figure_supplement_3.tif
- elife_poa_e77227_Figure_1_figure_supplement_4.tif
- elife_poa_e77227_Figure_1_figure_supplement_5.tif
- elife_poa_e77227_Figure_2_figure_supplement_1.tif
- elife_poa_e77227_Figure_2_figure_supplement_2.tif
- elife_poa_e77227_Supplementary_file_1.docx
- elife_poa_e77227_Supplementary_file_2.docx
- elife_poa_e77227_Transparent_Reporting_File.pdf
