# Supplementary material for: Transition to siblinghood causes a substantial and long-lasting increase in urinary cortisol levels in wild bonobos
Source: eLife journal article supplement (doi:10.7554/elife.77227), 2022-08-30
Supplement: supp [file elife-77227-supp-v1.zip › elife_poa_e77227_Supplementary_file_1.docx]

Supplementary File 1: General additive mixed model results for physiological changes (urinary cortisol and urinary neopterin levels; all log-transformed) in the older offspring seven years before and after sibling birth. Green: Classic interaction term derived from a separate model calculation (see methods section). ID: Individual. S-birth = sibling birth, * before = before sibling birth, * early after = 7- and 4.5-months following sibling birth for cortisol and neopterin, respectively, * late after = time following early after. Data points are physiological measures corrected for specific gravity (SG). All smooths are not controlled for age to show cumulative pattern.
