# Supplementary figures and images for: Transition to siblinghood causes a substantial and long-lasting increase in urinary cortisol levels in wild bonobos
Source: eLife journal article supplement (doi:10.7554/elife.77227), 2022-08-30

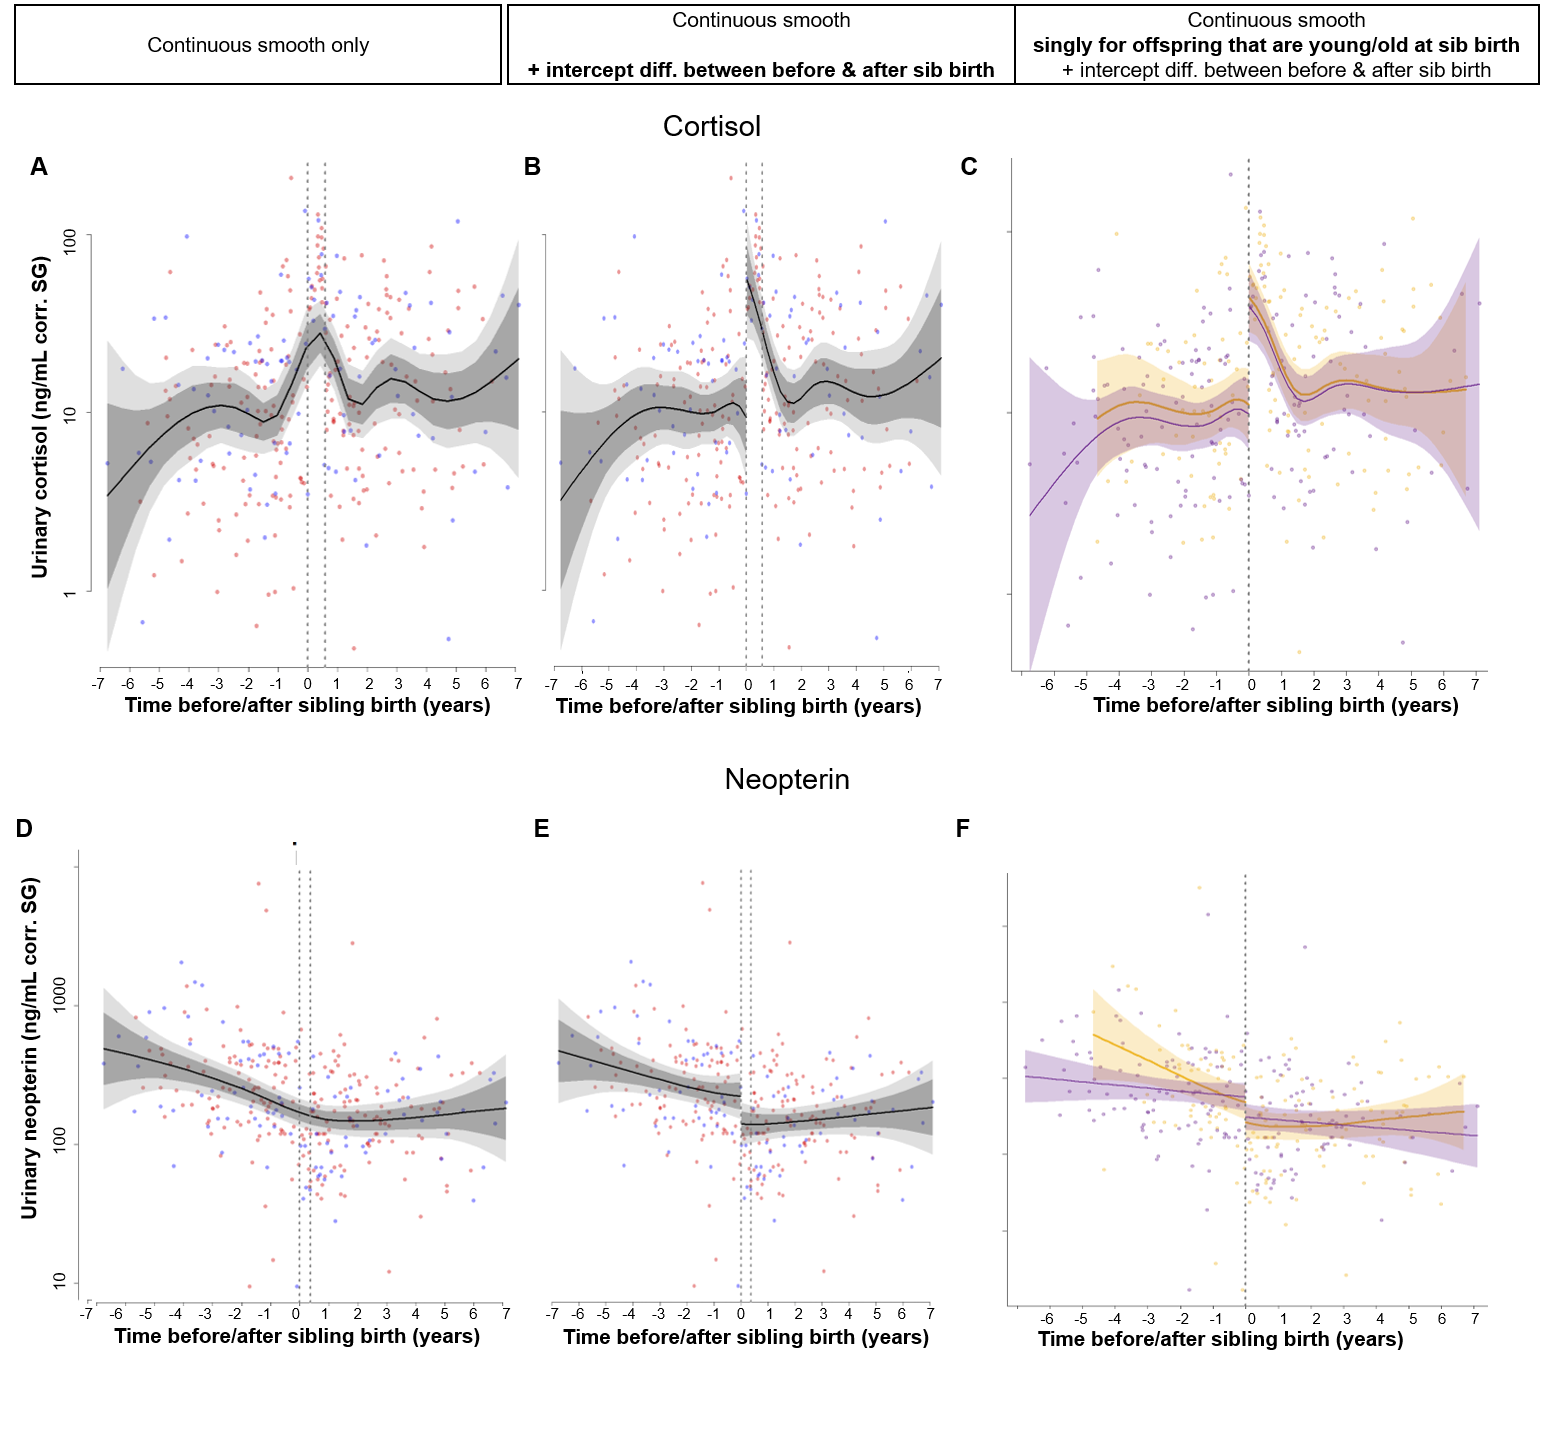

Supplement: supp [file elife-77227-supp-v1.zip › elife_poa_e77227_Figure_1_figure_supplement_1.tif]

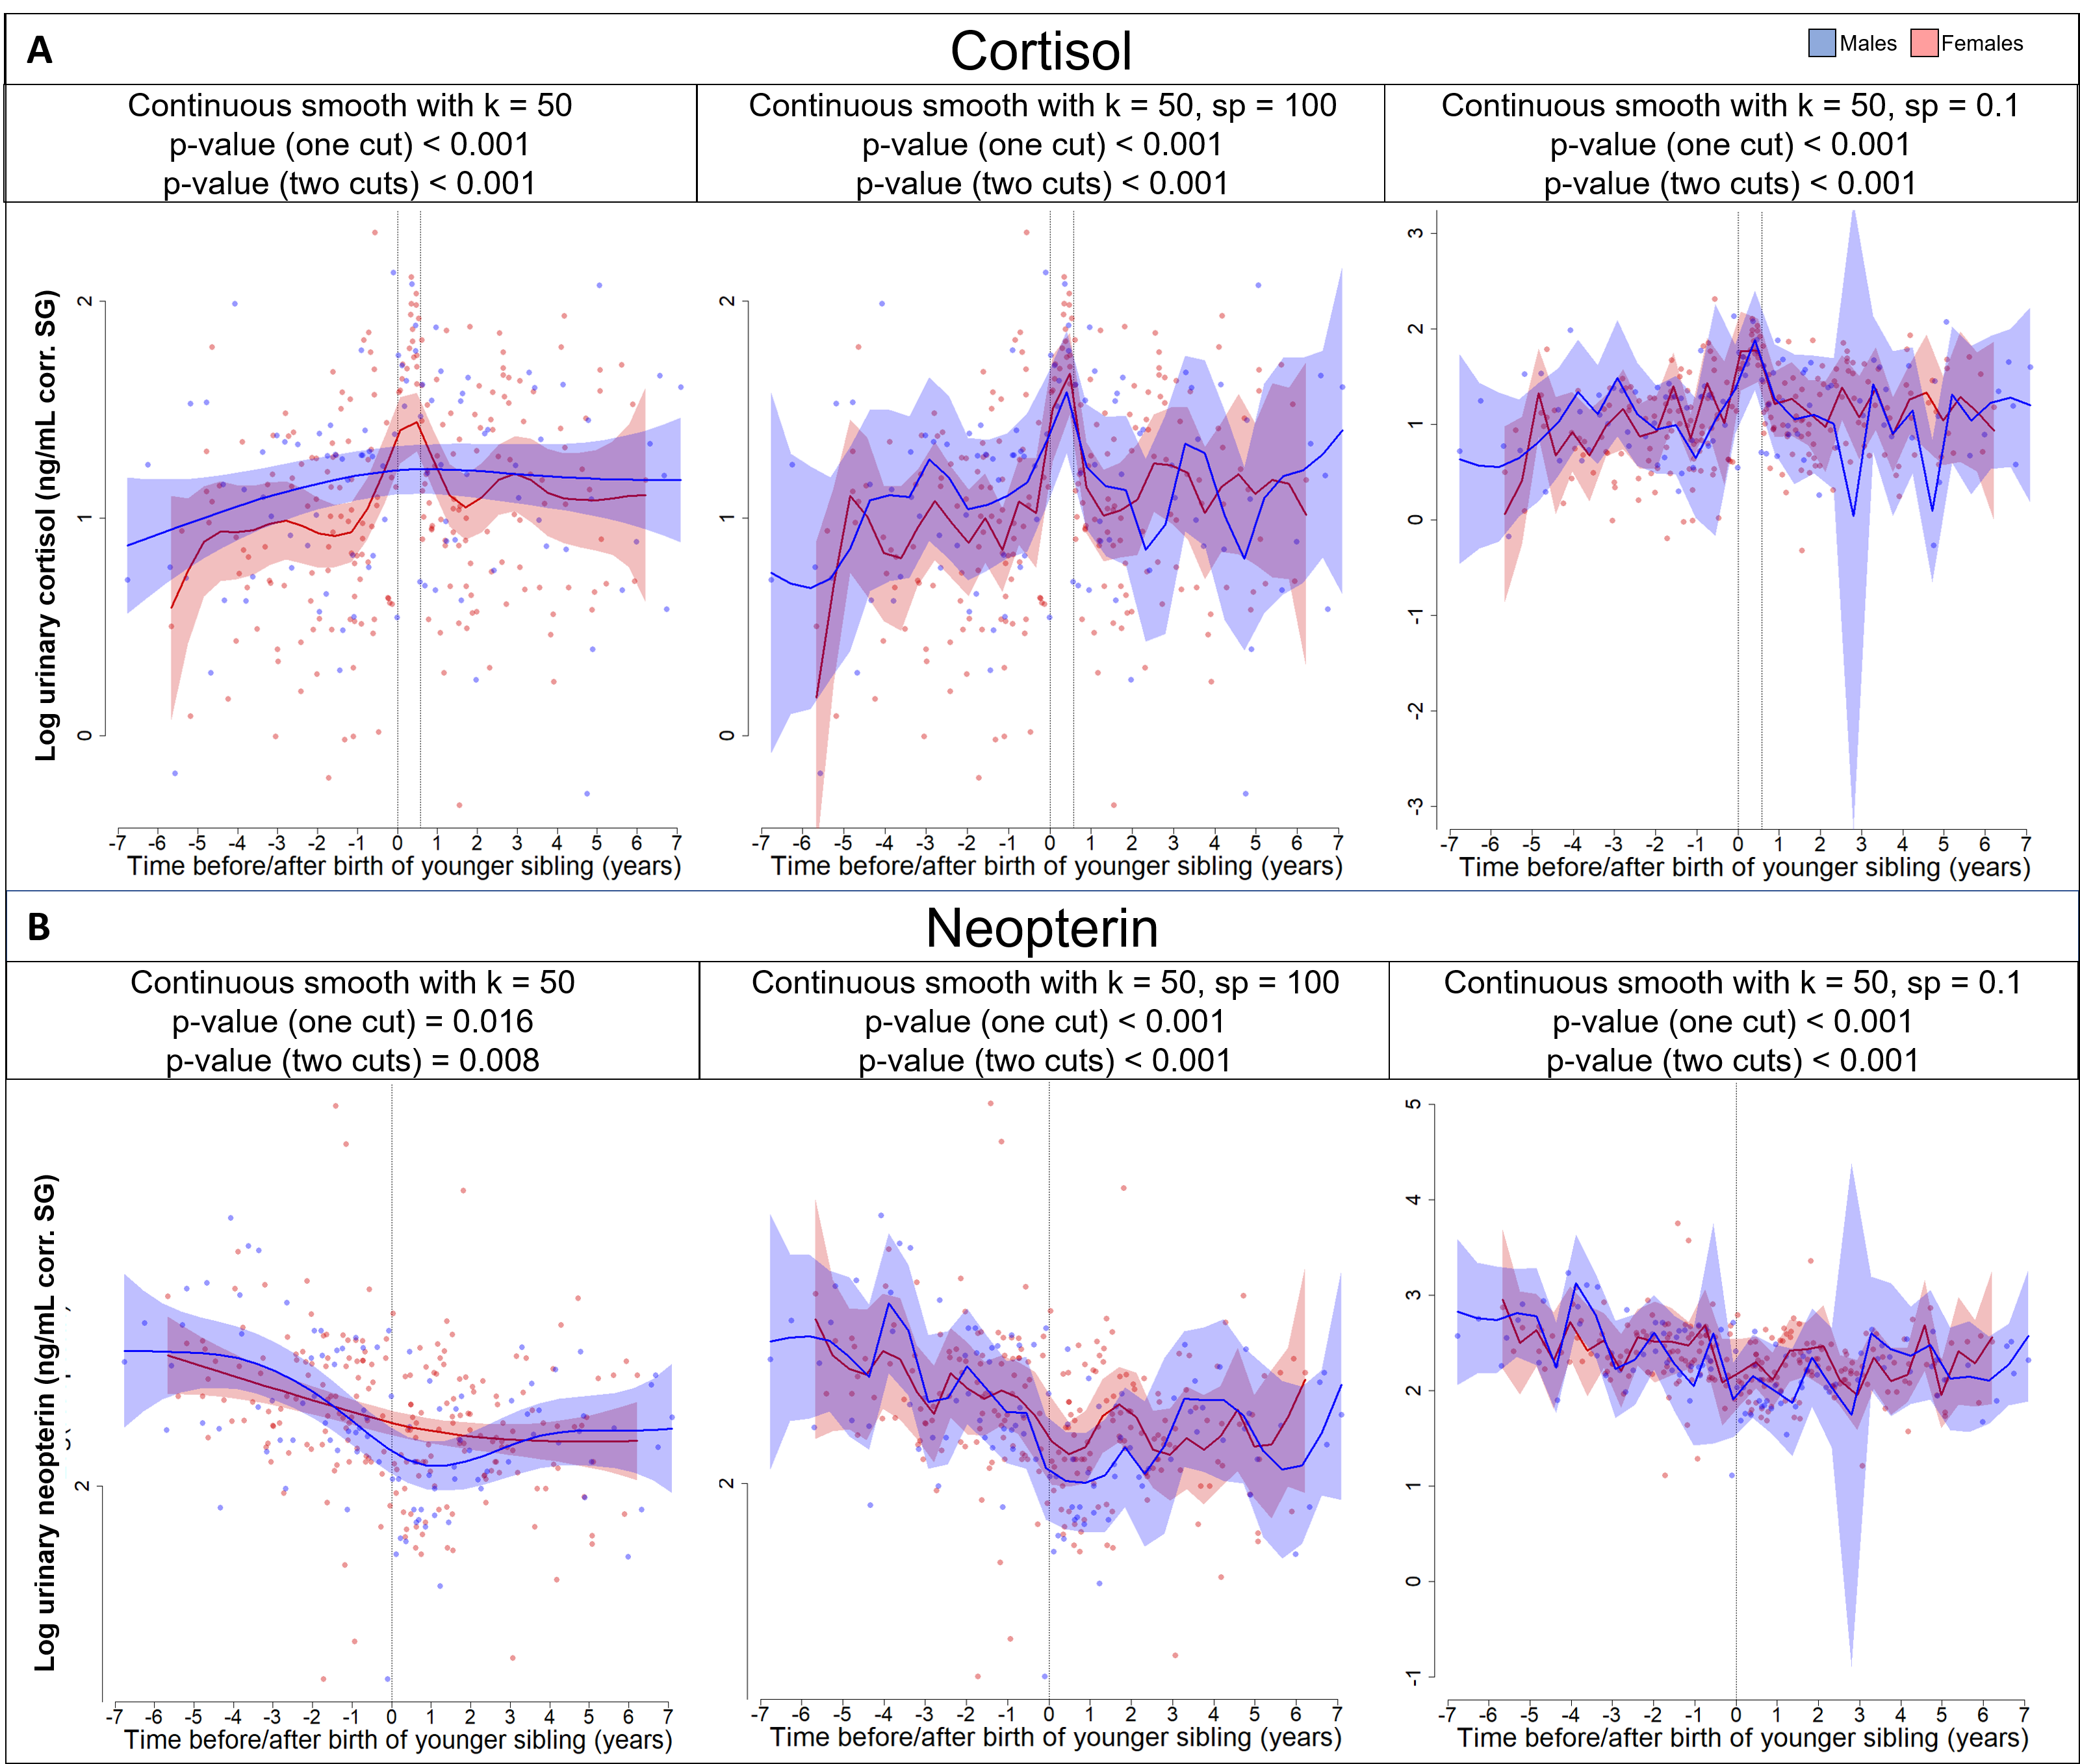

Supplement: supp [file elife-77227-supp-v1.zip › elife_poa_e77227_Figure_1_figure_supplement_2.tif]

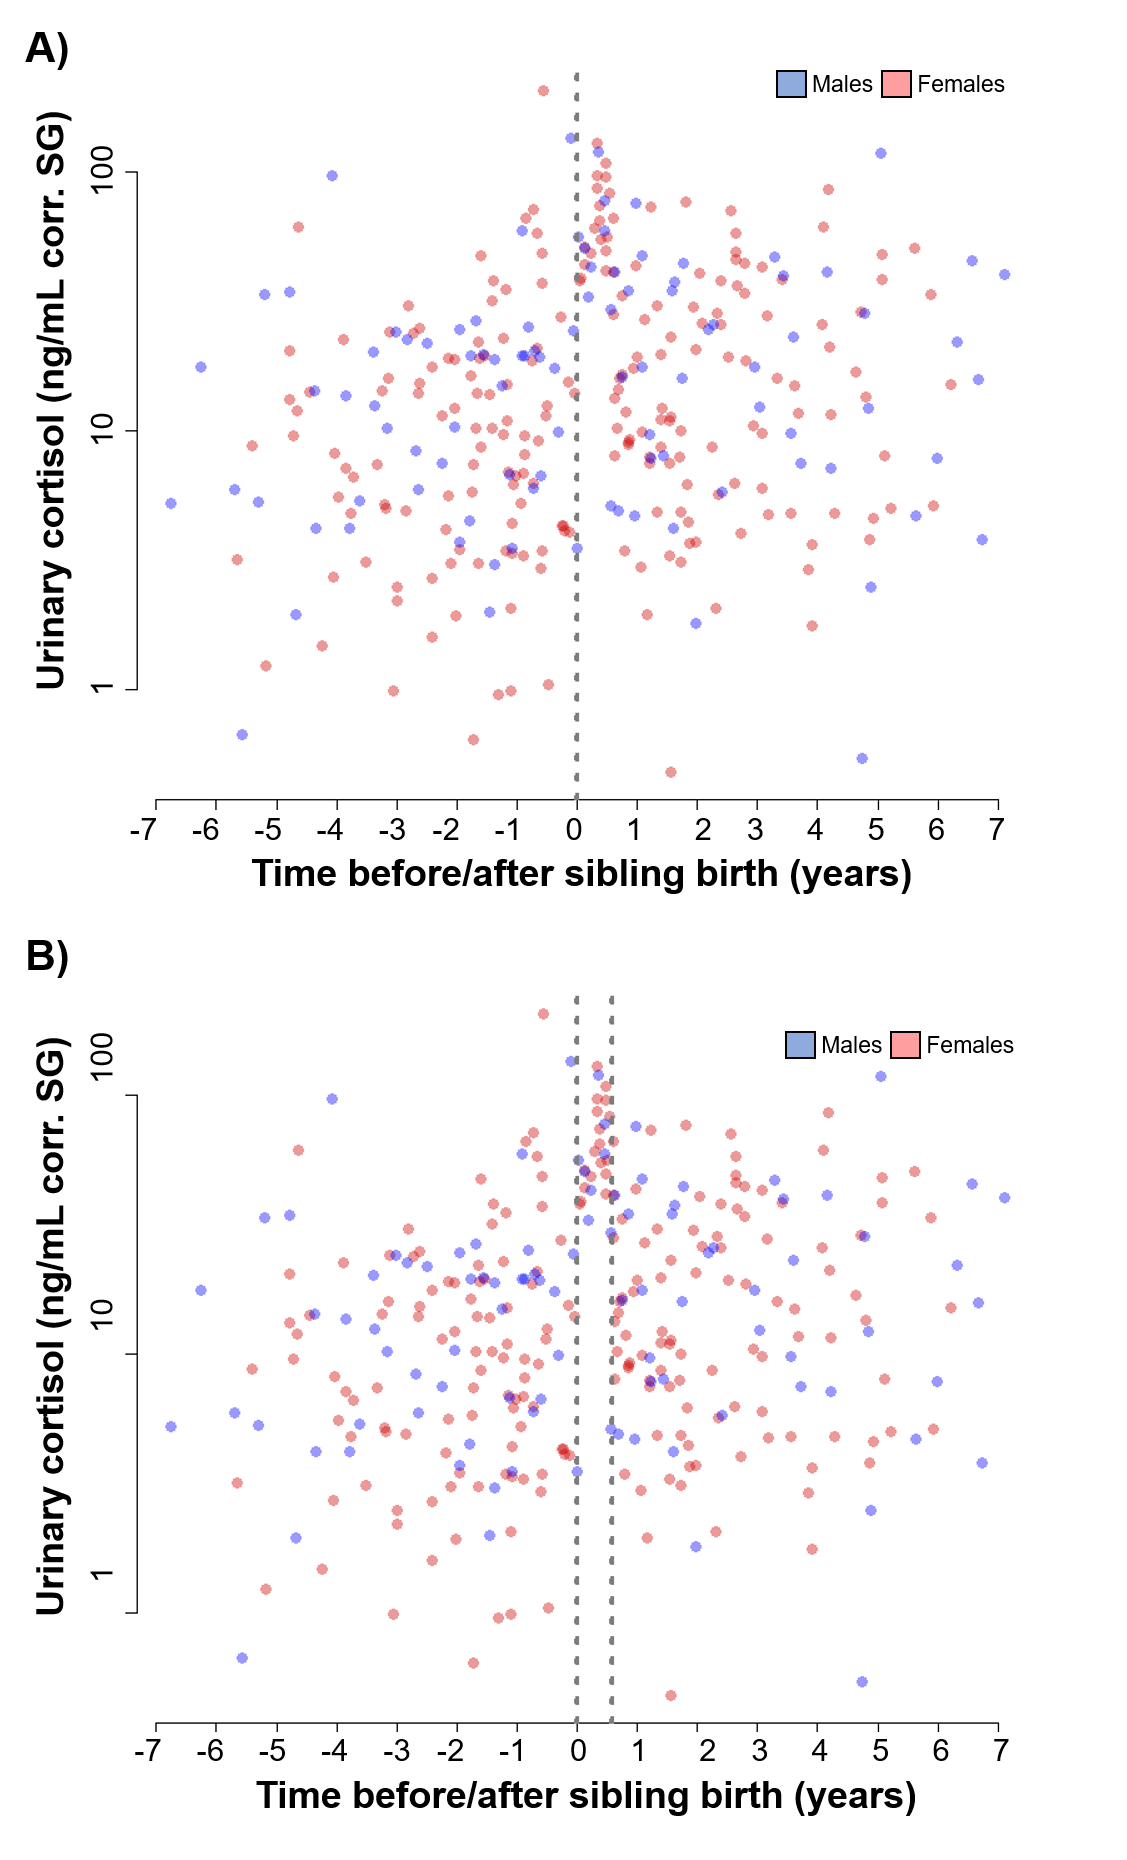

Supplement: supp [file elife-77227-supp-v1.zip › elife_poa_e77227_Figure_1_figure_supplement_3.tif]

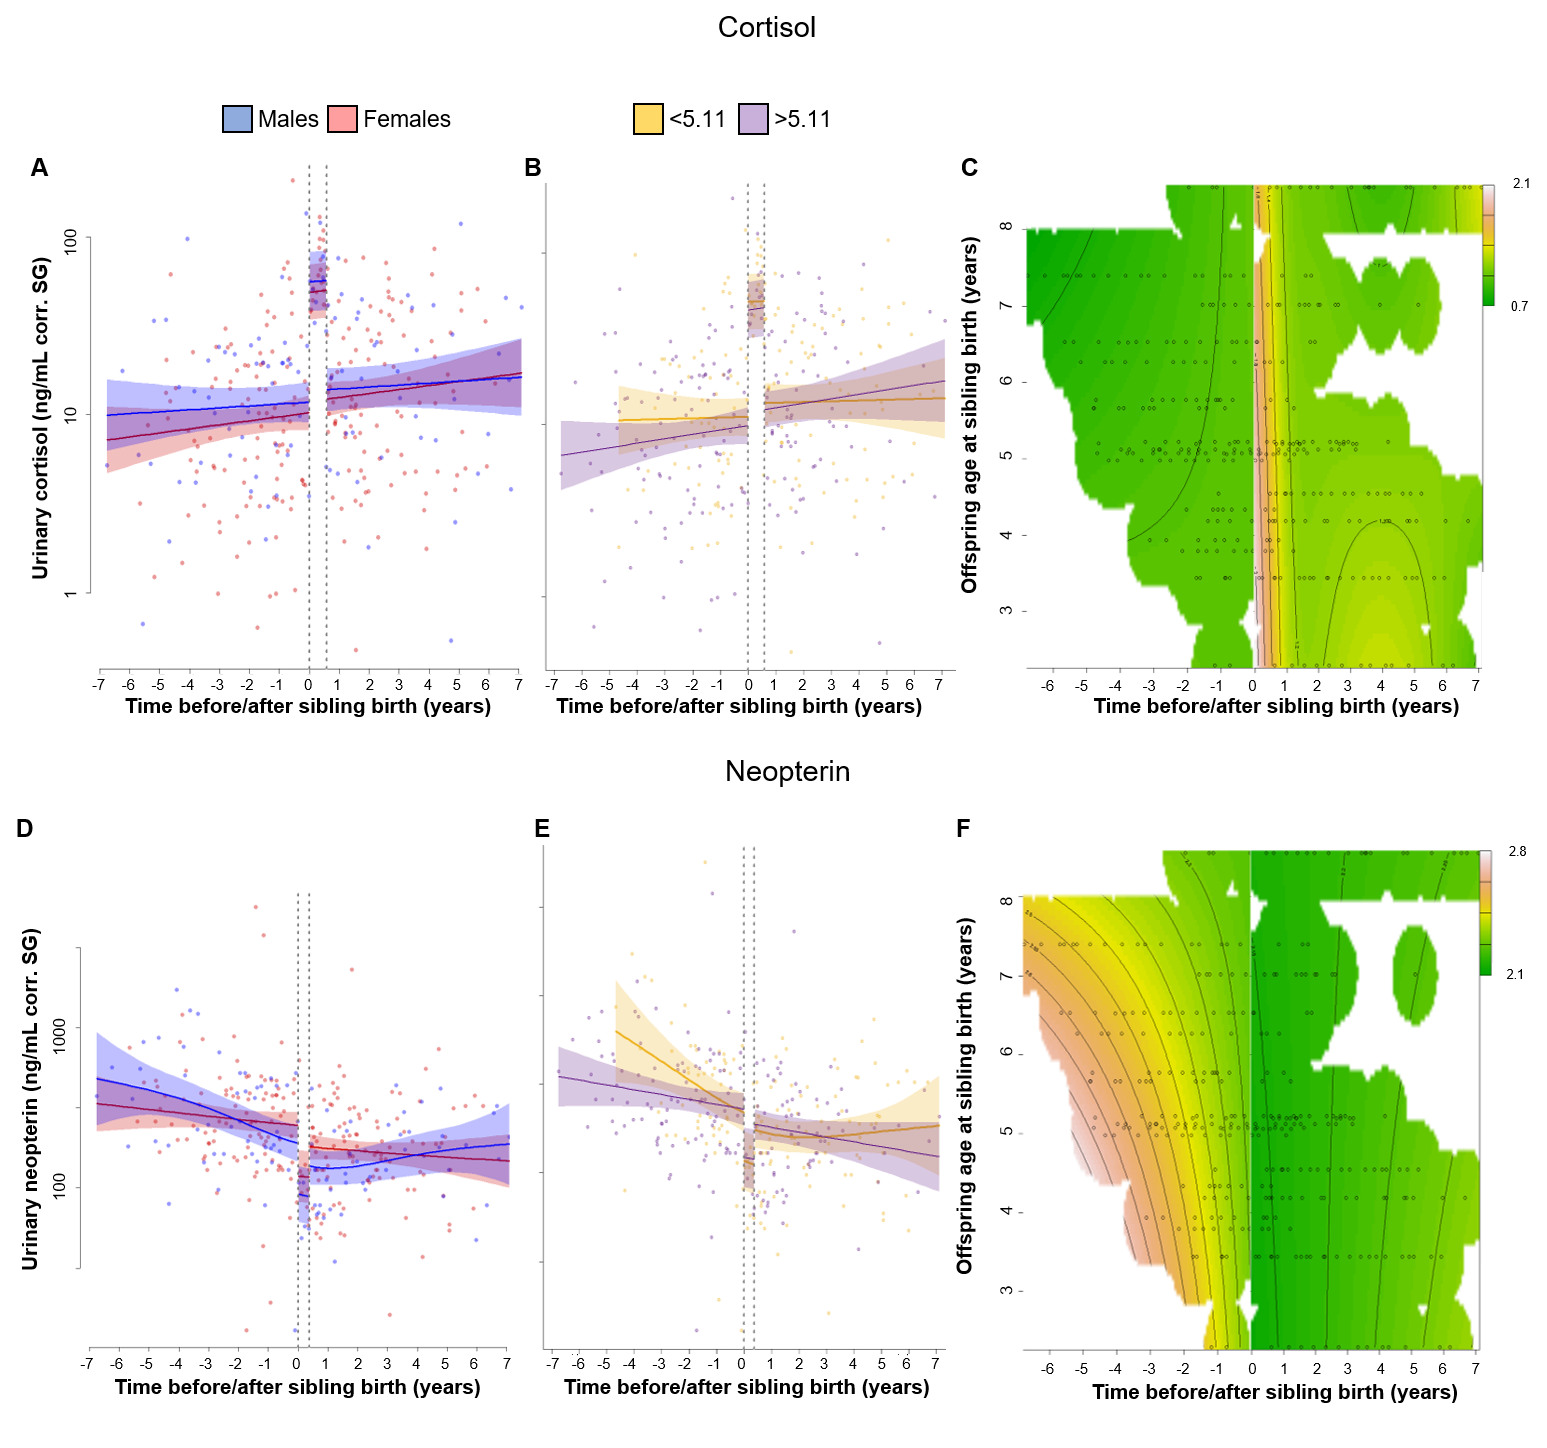

Supplement: supp [file elife-77227-supp-v1.zip › elife_poa_e77227_Figure_1_figure_supplement_4.tif]

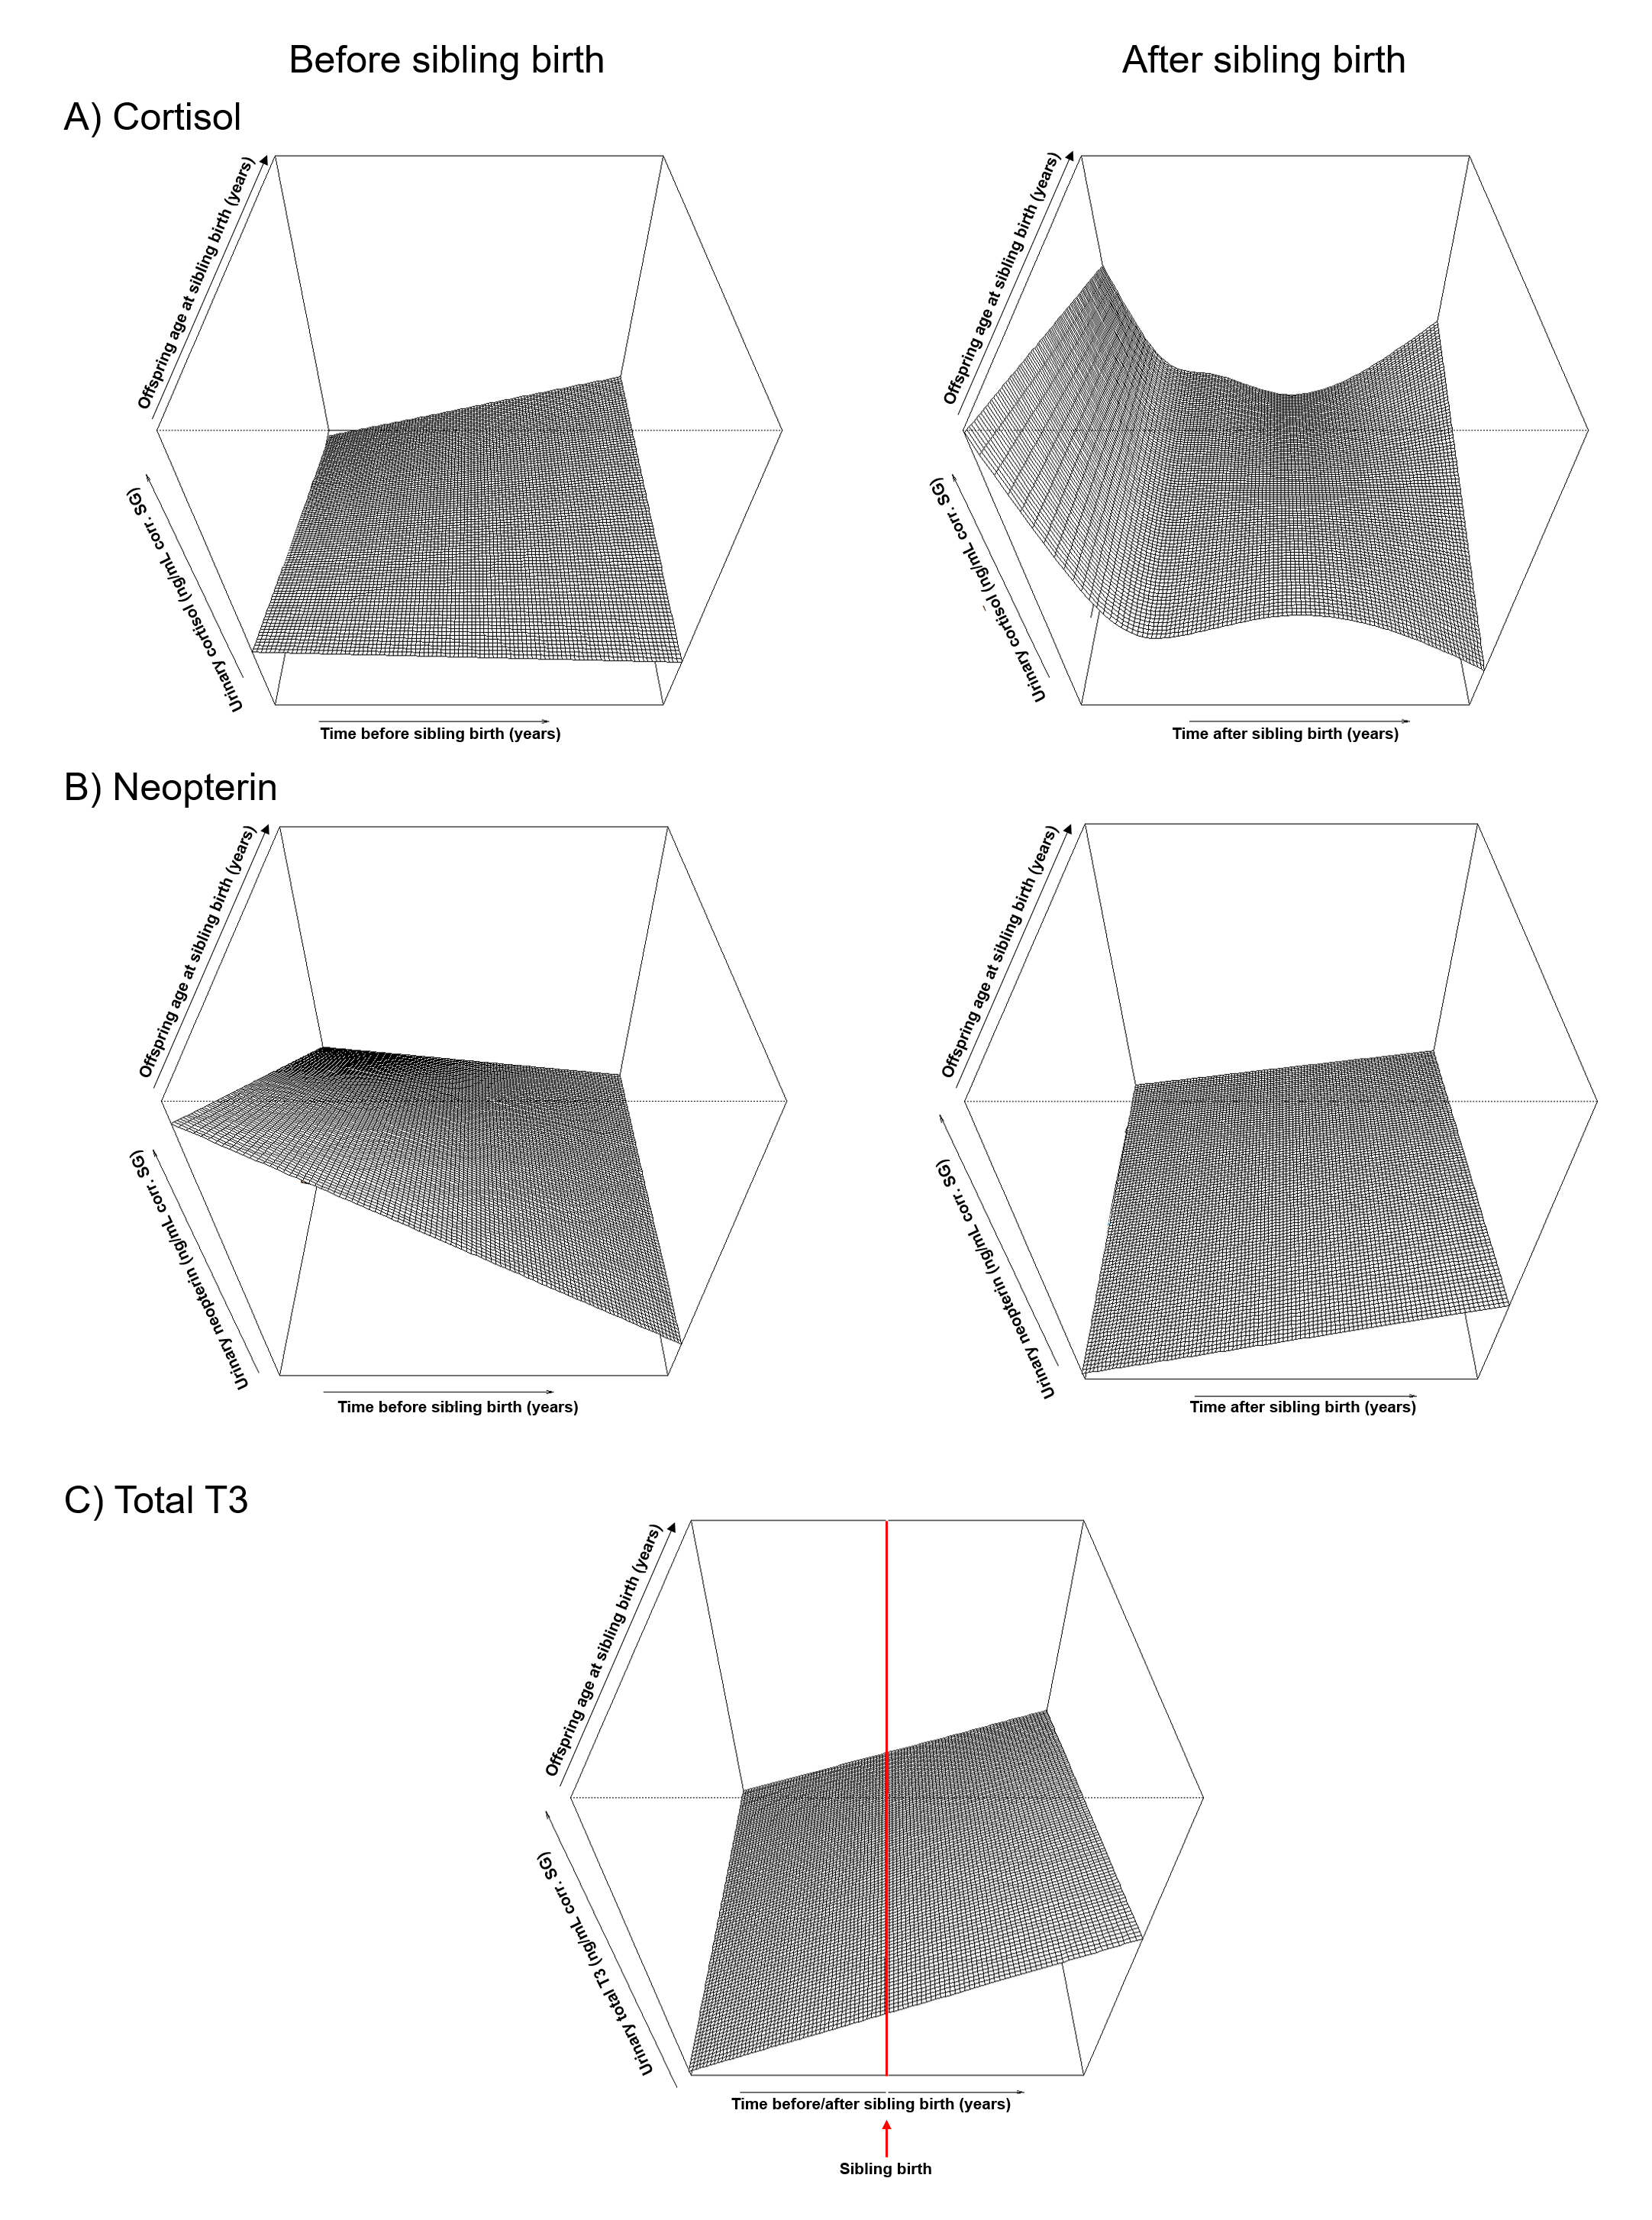

Supplement: supp [file elife-77227-supp-v1.zip › elife_poa_e77227_Figure_1_figure_supplement_5.tif]

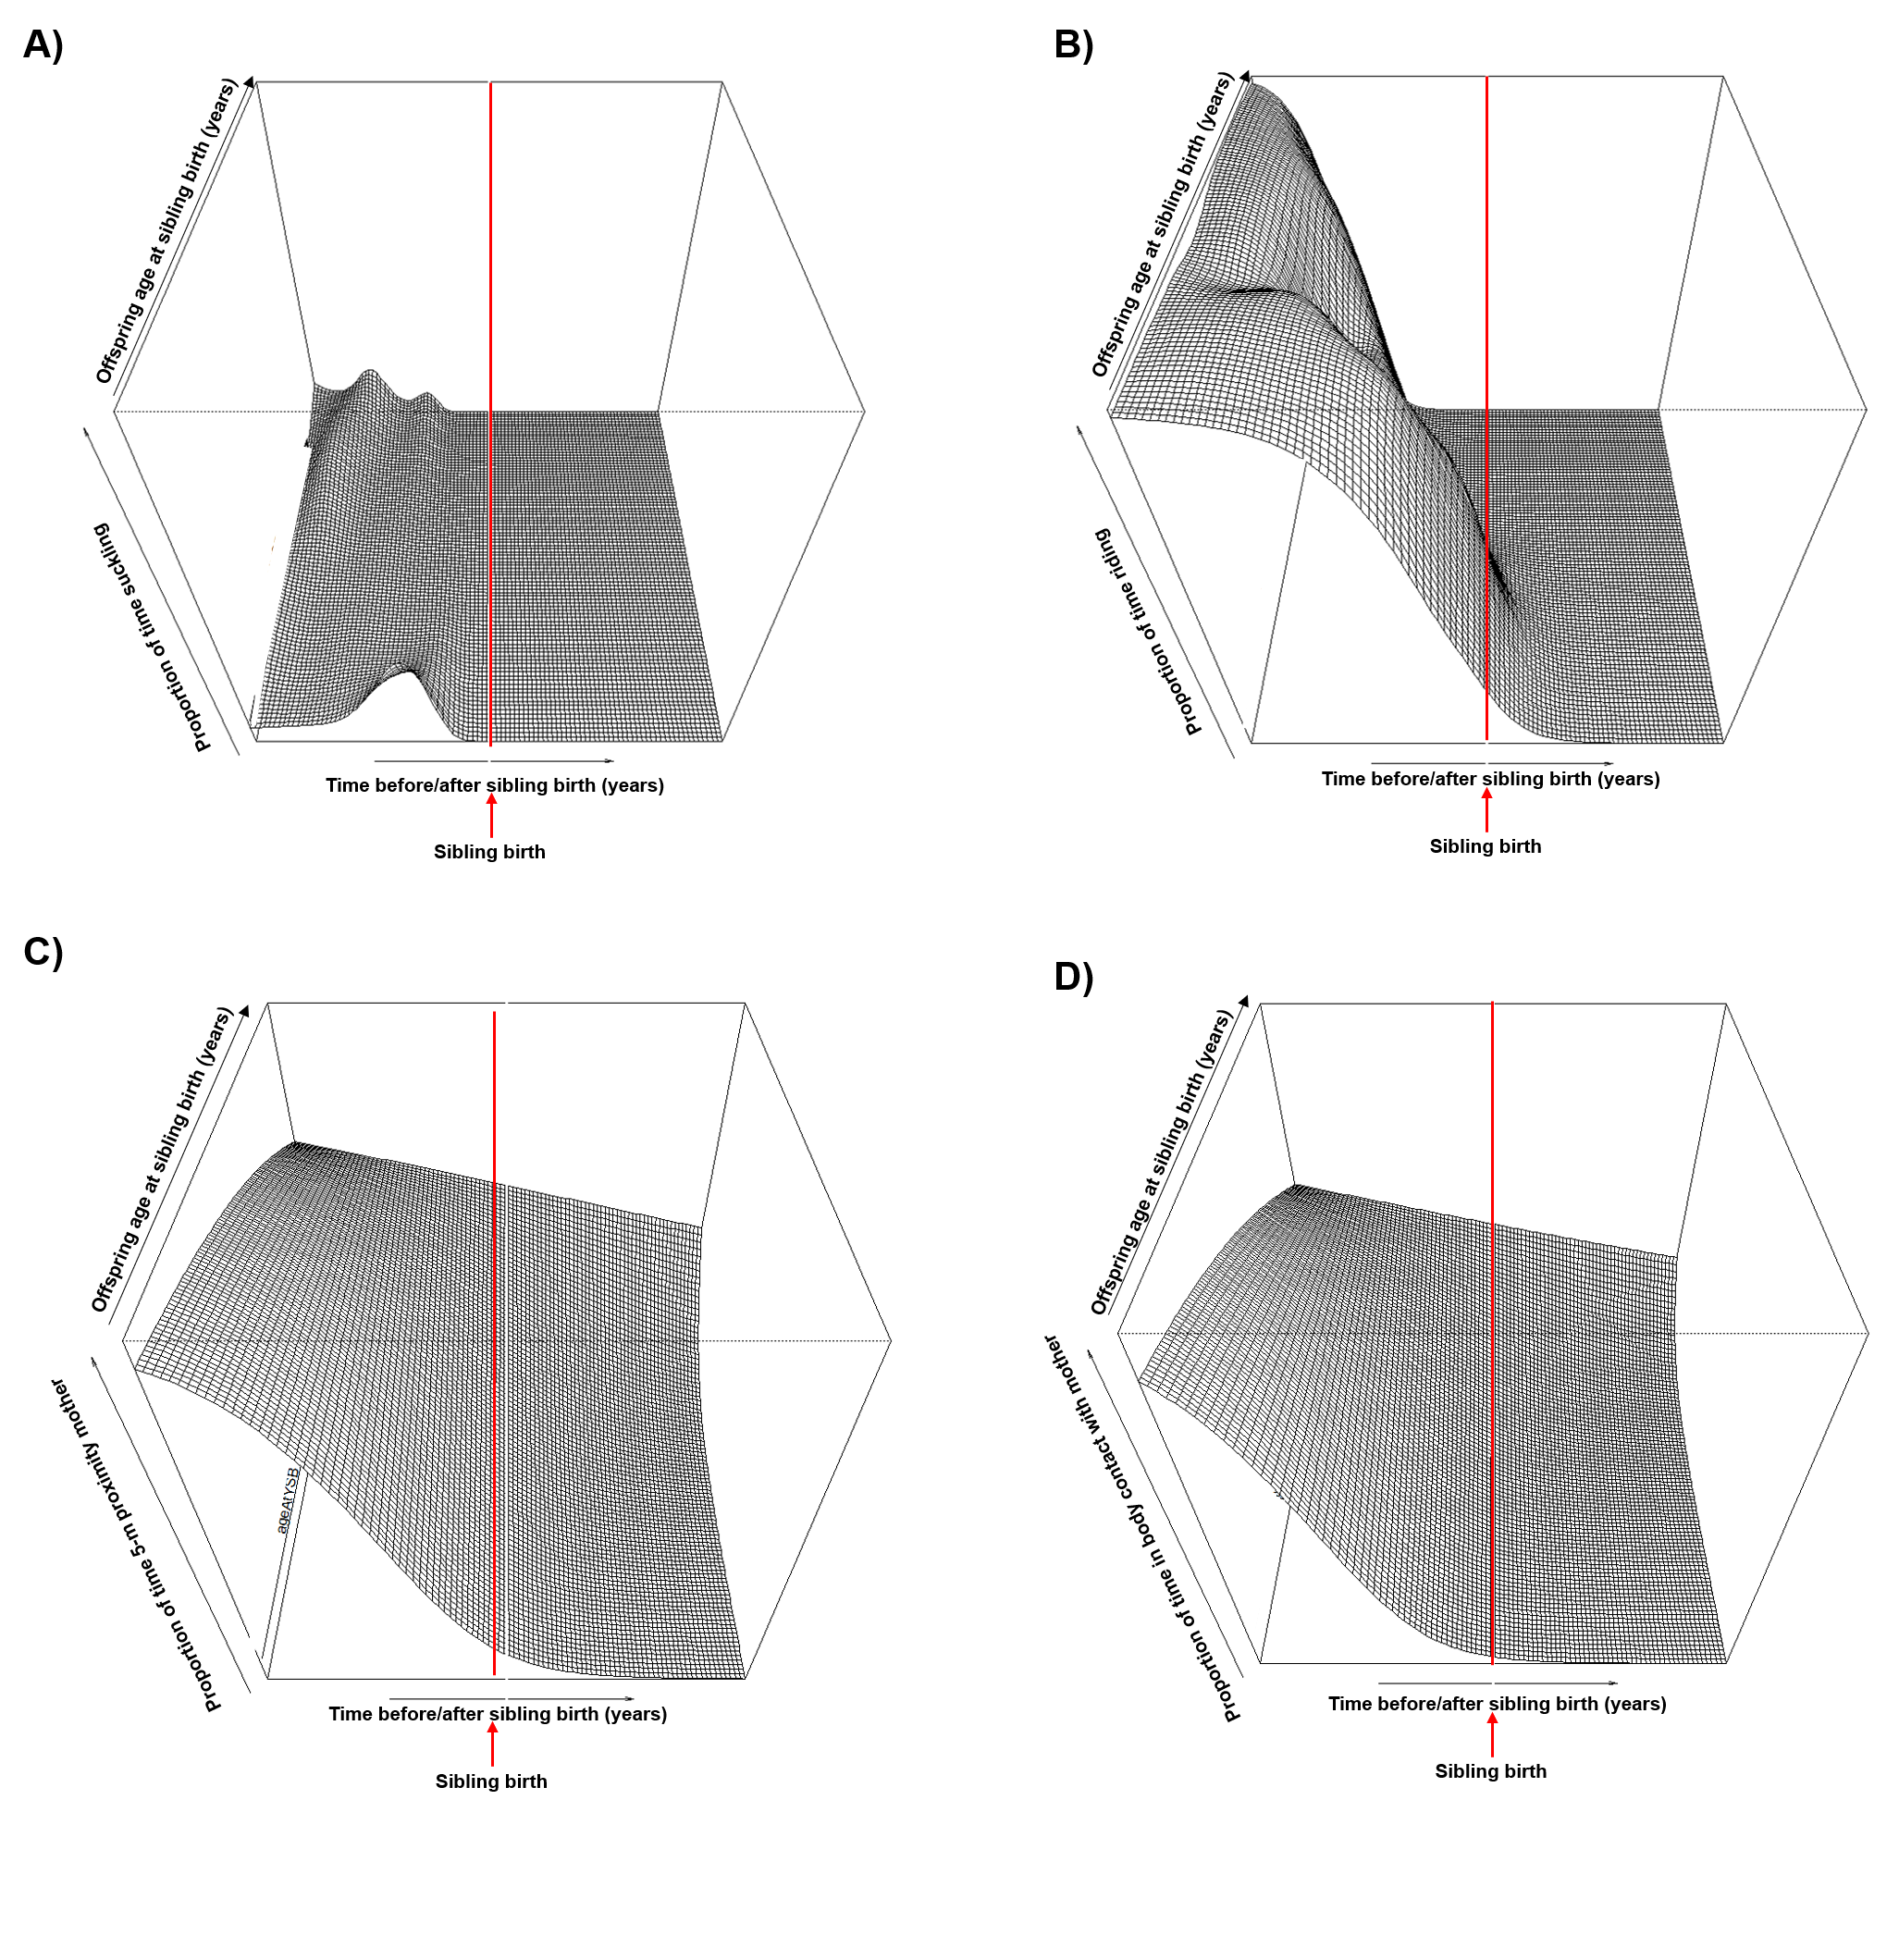

Supplement: supp [file elife-77227-supp-v1.zip › elife_poa_e77227_Figure_2_figure_supplement_1.tif]

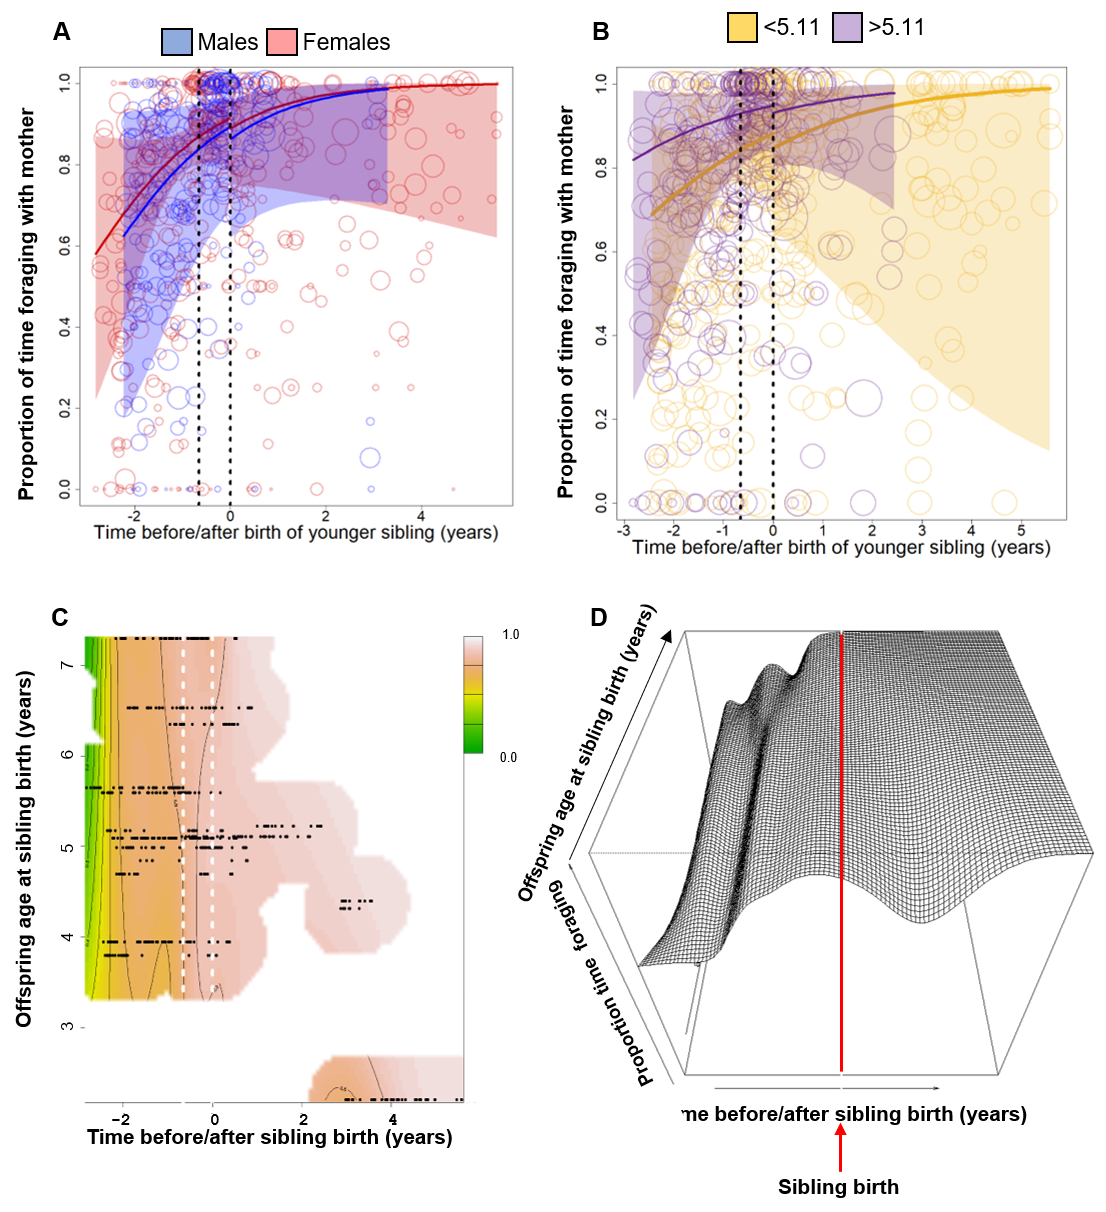

Supplement: supp [file elife-77227-supp-v1.zip › elife_poa_e77227_Figure_2_figure_supplement_2.tif]
